# Supplementary material for: Methane- and dissolved organic carbon-fueled microbial loop supports a tropical subterranean estuary ecosystem
Source: Springer Nature journal article supplement (doi:10.1038/s41467-017-01776-x), 2017-11-22
Supplement: 41467_2017_1776_MOESM3_ESM.pdf [file 41467_2017_1776_MOESM3_ESM.pdf]

## **Description of Additional Supplementary Files**

File Name: Supplementary Data 1

Description: Details of the samples used in the study.

File Name: Supplementary Data 2

Description: All observed phylogenetic affiliations based on sequence reads from 16S RNA genes.
