# Supplementary material for: Methane- and dissolved organic carbon-fueled microbial loop supports a tropical subterranean estuary ecosystem
Source: Nat Commun. 2017 Nov 28;8:1835. doi: 10.1038/s41467-017-01776-x (PMC5703975; doi:10.1038/s41467-017-01776-x)
Supplement: Supplementary file 4 — Supplementary Data 1 [file 41467_2017_1776_MOESM4_ESM.xlsx]

## Sheet: Supplementary Data 1
SUPPLEMENTARY DATA 1: Details of the samples used in the study.
Sample ID	Type	Season Collected	Sampling Location	Water Mass	Analyses Performed	comments	abbreviations (environmental samples)
13	water	2013-12-05	Cenote Bang	MBW	IC, DIC, CH4, DOC, δ13C-DIC, δ13C-CH4, δ13C-DOC	-	MFW	meteoric freshwater
14	water	2013-12-05	Cenote Bang	MBW	IC, DIC, CH4, DOC, δ13C-DIC, δ13C-DOC	-	MBW	meteoric brackish water
15	water	2013-12-05	Cenote Bang	MBW	IC, DIC, CH4, DOC, δ13C-DIC, δ13C-CH4, δ13C-DOC	-	SGW	saline groundwater
16	water	2013-12-05	Cenote Bang	MBW	IC, DIC, CH4, DOC, δ13C-DIC, δ13C-CH4, δ13C-DOC	-	POOL	pool (sinkhole/cenote)
17	water	2013-12-05	Cenote Bang	MFW	IC, DIC, CH4, DOC, δ13C-DIC, δ13C-CH4, δ13C-DOC	-	SEA	sea water
18	water	2013-12-05	Cenote Bang	MFW	IC, DIC, CH4, DOC, δ13C-DIC, δ13C-CH4, δ13C-DOC	-	SOIL	surface, jungle floor
19	water	2013-12-05	Cenote Bang	MBW	IC, DIC, CH4, DOC, δ13C-DIC, δ13C-CH4, δ13C-DOC	-
20	water	2013-12-05	Cenote Bang	MBW	IC, DIC, CH4, DOC, δ13C-DIC, δ13C-CH4, δ13C-DOC	-	abbreviations (analyses performed)
21	water	2013-12-05	Cenote Bang	MBW	IC, DIC, CH4, DOC, δ13C-DIC, δ13C-CH4, δ13C-DOC	-	IC	Ion Chromatography
22	water	2013-12-05	Cenote Bang	MBW	IC, DIC, CH4, DOC, δ13C-DIC, δ13C-CH4, δ13C-DOC	-	DIC	Coulometry to measure dissolved inorganic carbon
23	water	2013-12-05	Cenote Bang	SGW	IC, DIC, CH4, DOC, δ13C-DIC, δ13C-CH4, δ13C-DOC	-	CH4	Gas chromatography to measure CH4 concentrations
24	water	2013-12-05	Cenote Bang	MBW	IC, DIC, CH4, DOC, δ13C-DIC, δ13C-CH4, δ13C-DOC	-	δ13C-CH4	Gas-Chromatography-Isotope Ratio Mass Spectrometry (GC-IRMS) to measure stable carbon isotopic signature of methane
84	water	2014-08-16	Cenote Bang	MBW	IC, DIC, CH4, DOC, δ13C-DIC, δ13C-CH4, δ13C-DOC	-	δ13C-DIC	Gas-Chromatography-Isotope Ratio Mass Spectrometry (GC-IRMS) to measure stable carbon isotopic signature of DIC
85	water	2014-08-16	Cenote Bang	MBW	IC, DIC, CH4, DOC, δ13C-DIC, δ13C-CH4, δ13C-DOC	-	DOC	High Temperature-Catalytic Oxidation (HTCO)-IRMS to measure dissolved organic carbon
86	water	2014-08-16	Cenote Bang	MBW	IC, DIC, CH4, DOC, δ13C-DIC, δ13C-CH4, δ13C-DOC	-	CSIA	Compound-specific δ13C isotopic analysis of fatty acids
87	water	2014-08-16	Cenote Bang	MBW	IC, DIC, CH4, DOC, δ13C-DIC, δ13C-CH4, δ13C-DOC	-	Quinone	High Performance Liquid Chromatography-Mass Spectrometry to measure quinone conc.
88	water	2014-08-16	Cenote Bang	MBW	IC, CH4, DOC, δ13C-DIC, δ13C-CH4, δ13C-DOC	-	16S	16S rRNA gene clone library sequencing
89	water	2014-08-16	Cenote Bang	SGW	IC, CH4, DOC, δ13C-DIC, δ13C-CH4, δ13C-DOC	-
90	water	2014-08-16	Cenote Bang	SGW	IC, DIC, CH4, DOC, δ13C-DIC, δ13C-CH4, δ13C-DOC	-
92	water	2014-08-16	Cenote Bang	MFW	IC, DIC, CH4, δ13C-DIC	-
93	water	2014-08-16	Cenote Bang	MFW	IC, CH4, DOC, δ13C-DIC, δ13C-CH4, δ13C-DOC	-
94	water	2014-08-16	Cenote Bang	MBW	IC, DIC, DOC, δ13C-DIC, δ13C-CH4, δ13C-DOC	-
95	water	2014-08-16	Cenote Bang	MBW	IC, DIC, CH4, DOC, δ13C-DIC, δ13C-DOC	-
127	water	2015-01-13	Cenote Bang	SGW	IC, DIC, CH4, δ13C-DIC, δ13C-CH4	-
128	water	2015-01-13	Cenote Bang	SGW	IC, DIC, CH4, δ13C-DIC, δ13C-CH4	-
129	water	2015-01-13	Cenote Bang	SGW	IC, DIC, CH4, δ13C-DIC, δ13C-CH4	-
130	water	2015-01-13	Cenote Bang	SGW	IC, DIC, CH4, δ13C-DIC, δ13C-CH4	-
131	water	2015-01-13	Cenote Bang	SGW	IC, DIC, CH4, δ13C-DIC, δ13C-CH4	-
132	water	2015-01-13	Cenote Bang	SGW	IC, DIC, CH4, δ13C-DIC, δ13C-CH4	-
133	water	2015-01-13	Cenote Bang	SGW	IC, DIC, CH4, δ13C-DIC	-
134	water	2015-01-13	Cenote Bang	SGW	IC, DIC, δ13C-DIC	-
157	water	2015-01-15	Cenote Bang	MBW	IC, DIC, CH4, δ13C-DIC, δ13C-CH4	-
158	water	2015-01-15	Cenote Bang	MBW	IC, DIC, CH4, δ13C-DIC, δ13C-CH4	-
159	water	2015-01-15	Cenote Bang	MFW	IC, DIC, CH4, δ13C-DIC, δ13C-CH4	-
160	water	2015-01-16	Cenote Bang	MBW	IC, DIC, CH4, δ13C-DIC, δ13C-CH4	-
161	water	2015-01-16	Cenote Bang	MBW	IC, DIC, CH4, δ13C-DIC, δ13C-CH4	-
162	water	2015-01-16	Cenote Bang	MBW	IC, DIC, CH4, δ13C-DIC, δ13C-CH4	-
173	water	2015-01-16	Cenote Bang	MBW	IC, DIC, CH4, δ13C-DIC, δ13C-CH4	-
174	water	2015-01-16	Cenote Bang	MBW	IC, DIC, CH4, δ13C-DIC, δ13C-CH4	-
175	water	2015-01-16	Cenote Bang	MBW	IC, DIC, CH4, δ13C-DIC	-
180	water	2015-01-16	Cenote Bang	MFW	IC, DIC, CH4, δ13C-DIC, δ13C-CH4	-
181	water	2015-01-16	Cenote Bang	MFW	IC, DIC, CH4, δ13C-DIC, δ13C-CH4	-
182	water	2015-01-16	Cenote Bang	MBW	IC, DIC, CH4, δ13C-DIC, δ13C-CH4	-
124	water	2015-01-13	Cenote Bang	POOL	IC, DIC, CH4, δ13C-DIC, δ13C-CH4	-
125	water	2015-01-13	Cenote Bang	POOL	IC, DIC, CH4, δ13C-DIC, δ13C-CH4	-
126	water	2015-01-13	Cenote Bang	POOL	IC, DIC, CH4, δ13C-DIC, δ13C-CH4	-
183	water	2015-01-16	Coastal sea near Tulum	SEA	IC, DIC, CH4, δ13C-DIC, δ13C-CH4	-
184	water	2015-01-16	Coastal sea near Tulum	SEA	IC, DIC, CH4, δ13C-CH4	-
185	water	2015-01-16	Coastal sea near Tulum	SEA	IC, DIC, CH4, δ13C-DIC, δ13C-CH4	-
P-01	water filtrate	2015-06-13	Cenote Bang	MFW	δ13C-POM	-
P-02	water filtrate	2015-06-19	Cenote Bang	SGW	δ13C-POM	-
P-03	water filtrate	2015-06-19	Cenote Bang	MBW	δ13C-POM	-
P-04_A	water filtrate	2015-06-24	Cenote Bang	POOL	δ13C-POM	-
P-04_B	water filtrate	2015-06-24	Cenote Bang	POOL	δ13C-POM	-
P-05	water filtrate	2015-06-29	Coastal sea near Akumal	SEA	δ13C-POM	-
P06 POM	water filtrate	2016-01-20	Cenote Bang	MFW	δ13C-POM	-
P08 POM	water filtrate	2016-01-20	Cenote Bang	MFW	δ13C-POM	-
P09 POM	water filtrate	2016-01-21	Coastal sea near Tulum	SEA	δ13C-POM	-
P10 POM	water filtrate	2016-01-22	Cenote Bang	POOL	δ13C-POM	-
P11 POM	water filtrate	2016-01-22	Cenote Bang	MBW	δ13C-POM	-
P12 POM	water filtrate	2016-01-22	Cenote Bang	SGW	δ13C-POM	-
P13 POM	water filtrate	2016-01-22	Cenote Bang	MBW	δ13C-POM	-
P14 POM	water filtrate	2016-01-23	Cenote Bang	SGW	δ13C-POM	-
P09 A LIPID	water filtrate	2016-01-21	Coastal sea near Tulum	SEA	IPL & Quinone	-
P09 B LIPID	water filtrate	2016-01-21	Coastal sea near Tulum	SEA	IPL & Quinone	-
P09 C LIPID	water filtrate	2016-01-21	Coastal sea near Tulum	SEA	IPL & Quinone	-
12-M LIPID	water filtrate	2016-01-20	Cenote Bang	POOL	IPL & Quinone	-
6-M LIPID	water filtrate	2016-01-20	Cenote Bang	POOL	IPL & Quinone	-
7-M LIPID	water filtrate	2016-01-20	Cenote Bang	POOL	IPL & Quinone	-
P10 LIPID	water filtrate	2016-01-22	Cenote Bang	POOL	IPL & Quinone	-
P07 LIPID	water filtrate	2016-01-20	Cenote Bang	POOL	IPL & Quinone	-
P11 LIPID	water filtrate	2016-01-22	Cenote Bang	MBW	IPL & Quinone	-
P13 LIPID	water filtrate	2016-01-22	Cenote Bang	MBW	IPL & Quinone	-
10-M LIPID	water filtrate	2016-01-20	Cenote Bang	MFW	IPL & Quinone	-
5-M LIPID	water filtrate	2016-01-20	Cenote Bang	MFW	IPL & Quinone	-
8-M LIPID	water filtrate	2016-01-20	Cenote Bang	MFW	IPL & Quinone	-
9-M LIPID	water filtrate	2016-01-20	Cenote Bang	MFW	IPL & Quinone	-
P-06 LIPID	water filtrate	2016-01-20	Cenote Bang	MFW	IPL & Quinone	-
P-08 LIPID	water filtrate	2016-01-20	Cenote Bang	MFW	IPL & Quinone	-
P-12 LIPID	water filtrate	2016-01-22	Cenote Bang	SGW	IPL & Quinone	-
P-14 LIPID	water filtrate	2016-01-22	Cenote Bang	SGW	IPL & Quinone	-
M-01	water filtrate	2016-01-21	Coastal sea near Tulum	SEA	16S	-
M-02	water filtrate	2016-01-21	Coastal sea near Tulum	SEA	16S	-
M-03	water filtrate	2016-01-21	Coastal sea near Tulum	SEA	16S	-
P-07	water filtrate	2016-01-20	Cenote Bang	POOL	16S	-
M-05	water filtrate	2016-01-22	Cenote Bang	POOL	16S	-
M-10	water filtrate	2016-01-22	Cenote Bang	POOL	16S	-
M-11	water filtrate	2016-01-22	Cenote Bang	POOL	16S	-
M-12	water filtrate	2016-01-23	Cenote Bang	MFW	16S	-
M-13	water filtrate	2016-01-23	Cenote Bang	MFW	16S	-
M-14	water filtrate	2016-01-23	Cenote Bang	MFW	16S	-
M-16	water filtrate	2016-01-23	Cenote Bang	MFW	16S	-
M-17	water filtrate	2016-01-23	Cenote Bang	SGW	16S	-
M-21	water filtrate	2016-01-23	Cenote Bang	SGW	16S	-
M-04	water filtrate	2016-01-22	Cenote Bang	MBW	16S	-
M-07	water filtrate	2016-01-22	Cenote Bang	MBW	16S	-
M-09	water filtrate	2016-01-22	Cenote Bang	MBW	16S	-
CB-02	shrimp	2013-02-28	Cenote Bang	MBW	CSIA and bulk δ13C	genus: Typhlatya sp.
CB-04	shrimp	2013-08-01	Cenote Bang	MBW	CSIA and bulk δ13C	genus: Typhlatya sp.
CB-05	shrimp	2014-06-07	Cenote Bang	MBW	bulk δ13C and δD	genus: Typhlatya sp.
CB-06	shrimp	2014-06-07	Cenote Bang	MBW	bulk δ13C and δD	genus: Typhlatya sp.
CB-07	shrimp	2014-06-07	Cenote Bang	MBW	bulk δ13C and δD	genus: Typhlatya sp.
CB-08	shrimp	2014-06-07	Cenote Bang	MBW	bulk δ13C and δD	genus: Typhlatya sp.
CB-09	shrimp	2014-06-07	Cenote Bang	MBW	bulk δ13C and δD	genus: Typhlatya sp.
CB-10	shrimp	2014-06-07	Cenote Bang	MBW	bulk δ13C and δD	genus: Typhlatya sp.
CB-11	shrimp	2014-06-07	Cenote Bang	MBW	bulk δ13C and δD	genus: Typhlatya sp.
CB-12	shrimp	2014-06-07	Cenote Bang	MBW	bulk δ13C and δD	genus: Typhlatya sp.
CB-13	shrimp	2014-06-07	Cenote Bang	MBW	bulk δ13C and δD	genus: Typhlatya sp.
CB-14	shrimp	2014-06-07	Cenote Bang	MBW	bulk δ13C and δD	genus: Typhlatya sp.
JH-02	shrimp	2013-07-31	Cenote Jailhouse	MBW	bulk δ13C and δD	genus: Typhlatya sp.
JH-03	shrimp	2013-07-31	Cenote Jailhouse	MBW	bulk δ13C and δD	genus: Typhlatya sp.
CO-02	shrimp	2013-08-02	Cenote Odyssey	SGW	bulk δ13C and δD	genus: Typhlatya sp.
TA-01	shrimp	2013-08-03	Cenote NWH	MBW	bulk δ13C and δD	genus: Typhlatya sp.
TA-02	shrimp	2013-08-03	Cenote NWH	MBW	bulk δ13C and δD	genus: Typhlatya sp.
TA-03	shrimp	2013-08-03	Cenote NWH	MBW	bulk δ13C and δD	genus: Typhlatya sp.
TA-04	shrimp	2013-08-03	Cenote NWH	MBW	bulk δ13C and δD	genus: Typhlatya sp.
DZ-01	shrimp	2013-12-06	Cenote Dzilam	SGW	bulk δ13C and δD	genus: Typhlatya sp.
CC-06	shrimp	2013-07-24	Cenote Crustacea	MBW	bulk δ13C and δD	genus: Typhlatya sp.
CC-07	shrimp	2013-07-24	Cenote Crustacea	SGW	bulk δ13C and δD	genus: Typhlatya sp.
CC-08	shrimp	2013-07-24	Cenote Crustacea	MBW	bulk δ13C and δD	genus: Typhlatya sp.
CC-09	shrimp	2013-07-24	Cenote Crustacea	SGW	bulk δ13C and δD	genus: Typhlatya sp.
CC-10	shrimp	2013-07-24	Cenote Crustacea	SGW	bulk δ13C and δD	genus: Typhlatya sp.
CC-11	shrimp	2013-07-24	Cenote Crustacea	MBW	bulk δ13C and δD	genus: Typhlatya sp.
CC-12	shrimp	2013-07-24	Cenote Crustacea	SGW	bulk δ13C and δD	genus: Typhlatya sp.
CC-13	shrimp	2013-07-24	Cenote Crustacea	SGW	bulk δ13C and δD	genus: Typhlatya sp.
CC-14	shrimp	2013-07-24	Cenote Crustacea	MBW	bulk δ13C and δD	genus: Typhlatya sp.
CC-16	shrimp	2013-07-24	Cenote Crustacea	SGW	bulk δ13C and δD	genus: Typhlatya sp.
CBSF-01	insect	2015-06-19	near Cenote Bang	SOIL	bulk δ13C and δD	-
CBSF-02	insect	2015-06-19	near Cenote Bang	SOIL	bulk δ13C and δD	-
CBSF-03	insect	2015-06-19	near Cenote Bang	SOIL	bulk δ13C and δD	-
CBSF-04	insect	2015-06-19	near Cenote Bang	SOIL	bulk δ13C and δD	-
SO-01	soil	2015-06-19	near Cenote Bang	SOIL	bulk δ13C	-
SO-02	soil	2015-06-19	near Cenote Bang	SOIL	bulk δ13C	-
SO-03	soil	2015-06-19	near Cenote Bang	SOIL	bulk δ13C and δD	-
